# Supplementary material for: Outcomes of Secondary Intracapsular Intraocular Lens Implantation in Patients following Rhegmatogenous Retinal Detachment
Source: MDPI journal article supplement (doi:10.3390/jcm12247749), 2023-12-18
Supplement: s1 [file s1]

**Table S1. Demographics of patients who underwent secondary intracapsular IOL implantation (N=30)**

| Parameters                  | Value       |
|-----------------------------|-------------|
| Sex                         |             |
| Male                        | 18          |
| Female                      | 12          |
| Eye                         |             |
| Right                       | 18          |
| Left                        | 12          |
| Mean age (years)            | 55.77±10.32 |
| Mean AL (mm)                | 24.88±2.02  |
| Mean K value (D)            | 43.41±1.77  |
| IOL                         |             |
| Rayner 920H                 | 17          |
| SA60AT                      | 13          |
| Mean IOL power (D)          | 19.47±3.67  |
| Follow-up duration (months) | 24.2±5.06   |

Data are presented as numbers or means ± standard deviations. AL, axial length; IOL, intraocular lens; K: keratometry.

**Table S2. Refractive outcomes by macular status and IOL type**

| <b>Refractive outcome (SRK/T)</b> | <b>ME (D)</b> | <b>MAE (D)</b> |
|-----------------------------------|---------------|----------------|
| All eyes                          | -0.45±0.68    | 0.62±0.52      |
| Macular status                    |               |                |
| Macula-on (n=7)                   | -0.00±0.33    | 0.25±0.19      |
| Macula-off (n=23)                 | -0.58±0.70    | 0.73±0.53      |
| <i>P</i> value                    | 0.046*        | 0.008*         |
| IOL type                          |               |                |
| Rayner 920H                       | -0.58±0.64    | 0.68±0.53      |
| SA60AT                            | -0.26±0.71    | 0.54±0.51      |
| <i>P</i> value                    | 0.205         | 0.509          |

Data are presented as numbers or means ± standard deviations. IOL, intraocular lens; ME, mean prediction error; MAE, mean absolute prediction error.

\*Student's t-test (normally distributed data) or nonparametric Mann-Whitney's test (non-normally distributed data) was used for subgroup comparisons. *P*<0.05 indicated statistical significance.

**Table S3. Comparison of baseline characteristics and 2-month postoperative ACD in secondary versus primary IOL implantation**

| <b>Parameters</b>             | <b>Secondary<br/>intracapsular IOL<br/>implantation (N=30)</b> | <b>Control (phaco and<br/>primary IOL<br/>implantation)<br/>(N=30)</b> | <b><i>P</i> value *</b> |
|-------------------------------|----------------------------------------------------------------|------------------------------------------------------------------------|-------------------------|
| <b>Sex</b>                    |                                                                |                                                                        |                         |
| <b>Female</b>                 | 12                                                             | 15                                                                     | 0.604                   |
| <b>Male</b>                   | 18                                                             | 15                                                                     |                         |
| <b>Eye</b>                    |                                                                |                                                                        |                         |
| <b>Right</b>                  | 18                                                             | 20                                                                     | 0.789                   |
| <b>Left</b>                   | 12                                                             | 10                                                                     |                         |
| <b>Mean age (years)</b>       | 55.77±10.32                                                    | 58.43±16.10                                                            | 0.449                   |
| <b>Mean AL (mm)</b>           | 24.88±2.02                                                     | 25.56±1.80                                                             | 0.175                   |
| <b>Postoperative ACD (mm)</b> | 4.81±0.63                                                      | 4.93±0.40                                                              | 0.478                   |

Data are presented as numbers or mean ± standard deviation. IOL, intraocular lens; AL, axial length; ACD, anterior chamber depth.

\*Student's t-test (for continuous variables) or chi-squared test (for categorical variables) was used for comparison between the two cohorts. *P*<0.05 indicated statistical significance

**Table S4. Outcome of 5 cases underwent air tamponade for RRD and secondary IOL implantation**

| Case | Gender<br>/<br>Eye/<br>Age/ | BCVA<br>(LogMAR) |       | SE<br>(D)       |        | IOP<br>(mmHg)   |       | ECD<br>(cells/mm2) |         | SRK/T<br>ME<br>(D) | H-<br>Decent<br>ration<br>(mm) | H-<br>Tilt<br>(degree<br>) | V-<br>Decent<br>ration<br>(mm) | V-<br>Tilt<br>(degree<br>) | Follow-<br>up<br>(months) |
|------|-----------------------------|------------------|-------|-----------------|--------|-----------------|-------|--------------------|---------|--------------------|--------------------------------|----------------------------|--------------------------------|----------------------------|---------------------------|
|      |                             | Pre              | Post  | Pre             | Post   | Pre             | Post  | Pre                | Post    |                    |                                |                            |                                |                            |                           |
|      |                             | <i>P</i> =0.280  |       | <i>P</i> =0.000 |        | <i>P</i> =0.387 |       | <i>P</i> =0.177    |         |                    |                                |                            |                                |                            |                           |
| 1    | M/L/53                      | 0.52             | 0.15  | 5.125           | -4.375 | 14.4            | 15    | 2730               | 2283    | -0.045             | 0.61                           | 0.81                       | 0.12                           | 0.51                       | 6                         |
| 2    | M/L/58                      | 0.15             | 0.05  | 9.25            | -4.75  | 18.5            | 13    | 2804               | 2630    | -1.04              | 0.22                           | 0.78                       | 0.81                           | 0.41                       | 5                         |
| 3    | F/L/70                      | 0.70             | 0.30  | 12.625          | -0.625 | 13.6            | 19.9  | 2469               | 1859    | -0.425             | 0.24                           | 1.02                       | 0.17                           | 0.07                       | 6                         |
| 4    | F/L/65                      | 0.52             | 0.70  | 10.75           | -0.5   | 13.5            | 16.1  | 2183               | 2262    | -0.46              | 0.36                           | 0.16                       | 0.35                           | 1.19                       | 4                         |
| 5    | M/L/55                      | 0.82             | 0.82  | 7.25            | -1.625 | 14.2            | 21.1  | 2695               | 2740    | -0.585             | 1.09                           | 2.33                       | 0.99                           | 1.44                       | 5                         |
| Mean |                             | 0.54             | 0.40  | 9.00            | -2.38  | 14.84           | 17.02 | 2576               | 2354    | -0.51              | 0.50                           | 1.01                       | 0.49                           | 0.72                       | 5.20                      |
| ± SD |                             | ± 0.25           | ±0.34 | ±2.93           | ±2.05  | ±2.08           | ±3.39 | ±252.86            | ±347.74 | ±0.36              | ±0.36                          | ±0.80                      | ±0.39                          | ±0.57                      | ±0.84                     |
